# Supplementary material for: Railway underpass location affects migration distance in Tibetan antelope (Pantholops hodgsonii)
Source: PLoS One. 2019 Feb 4;14(2):e0211798. doi: 10.1371/journal.pone.0211798 (PMC6361455; doi:10.1371/journal.pone.0211798)
Supplement: S1 File — (CSV) [file pone.0211798.s007.csv]

ID_Year	Latitude	Longitude	date	LC
35_2010	35.26	94.569	1/20/10 15:45	1
35_2010	35.252	94.512	2/9/10 15:34	1
35_2010	35.238	94.555	2/13/10 15:37	2
35_2010	35.252	94.553	3/5/10 19:06	1
35_2010	35.206	94.47	3/29/10 15:28	1
35_2010	35.141	94.323	4/6/10 15:42	1
35_2010	35.132	94.304	4/6/10 16:44	2
35_2010	35.16	94.262	4/22/10 15:40	2
35_2010	35.165	94.268	4/22/10 18:41	2
35_2010	35.35	93.563	5/4/10 16:55	1
35_2010	35.346	93.57	5/4/10 18:52	3
35_2010	35.326	93.521	5/8/10 16:14	1
35_2010	35.323	93.582	5/12/10 15:36	2
35_2010	35.32	93.589	5/12/10 17:15	2
35_2010	35.305	93.612	5/16/10 16:34	1
35_2010	35.341	93.621	5/20/10 15:52	1
35_2010	35.345	93.627	5/20/10 19:08	1
35_2010	35.313	93.586	5/24/10 16:49	2
35_2010	35.333	93.566	5/28/10 16:32	1
35_2010	35.352	93.48	6/1/10 17:09	2
35_2010	35.353	93.478	6/1/10 19:18	1
35_2010	35.297	93.356	6/5/10 16:49	1
35_2010	35.259	93.14	6/9/10 15:44	1
35_2010	35.412	93.18	6/13/10 16:46	2
35_2010	35.499	92.538	6/21/10 15:24	1
35_2010	35.492	92.524	6/21/10 15:40	3
35_2010	35.488	92.525	6/21/10 17:03	2
35_2010	35.468	91.983	6/29/10 15:42	3
35_2010	35.468	91.98	6/29/10 15:55	3
35_2010	35.487	92.007	7/3/10 16:40	2
35_2010	35.488	92	7/3/10 16:53	2
35_2010	35.488	92.027	7/7/10 16:09	3
35_2010	35.475	92.049	7/11/10 16:59	1
35_2010	35.476	92.047	7/11/10 17:09	2
35_2010	35.476	92.934	7/23/10 16:41	1
35_2010	35.352	93.29	7/27/10 15:59	1
35_2010	35.363	93.381	7/31/10 16:53	1
35_2010	35.331	93.553	8/12/10 16:28	3
35_2010	35.332	93.552	8/12/10 16:28	3
35_2010	35.329	93.623	8/16/10 15:46	1
35_2010	35.327	93.634	8/16/10 15:47	1
35_2010	35.318	93.602	8/20/10 16:43	2
35_2010	35.314	93.598	8/20/10 16:47	1
35_2010	35.308	93.582	8/24/10 16:00	1
35_2010	35.31	93.589	8/24/10 16:02	1
35_2010	35.323	93.662	8/28/10 16:57	2
35_2010	35.316	93.662	8/28/10 19:04	1
35_2010	35.308	93.674	9/1/10 16:21	1
35_2010	35.339	93.689	9/9/10 16:42	1
35_2010	35.322	93.673	9/9/10 19:16	2
35_2010	35.321	93.66	9/25/10 15:36	2
35_2010	35.326	93.609	10/3/10 15:37	3
35_2010	35.331	93.524	10/11/10 15:53	3
35_2010	35.337	93.519	10/11/10 16:09	1
35_2010	35.33	93.564	10/15/10 15:28	3
35_2010	35.309	93.6	10/19/10 16:06	3
35_2010	35.306	93.599	10/19/10 16:30	3
35_2010	35.34	93.632	10/23/10 15:46	1
35_2010	35.311	93.615	10/31/10 16:06	2
35_2010	35.318	93.613	10/31/10 17:19	1
35_2010	35.318	93.617	10/31/10 18:26	3
35_2010	35.336	93.634	11/4/10 16:36	1
35_2010	35.352	93.651	11/8/10 15:54	2
35_2010	35.349	93.65	11/8/10 18:34	2
35_2010	35.351	93.614	11/12/10 15:41	2
35_2010	35.356	93.608	11/28/10 15:42	1
38_2010	35.04	93.272	1/4/10 15:48	1
38_2010	35.031	93.262	1/4/10 16:51	2
38_2010	34.993	93.25	1/16/10 17:02	1
38_2010	35.039	93.264	1/20/10 15:45	3
38_2010	35.038	93.256	1/24/10 15:40	1
38_2010	35.038	93.269	1/24/10 17:22	1
38_2010	35.03	93.265	2/1/10 16:58	2
38_2010	35.024	93.224	2/1/10 17:38	1
38_2010	35.047	93.258	2/9/10 17:13	2
38_2010	35	93.157	2/17/10 15:46	1
38_2010	35.038	93.247	2/17/10 17:28	1
38_2010	35.04	93.275	3/5/10 17:10	1
38_2010	35.008	93.245	3/9/10 17:18	1
38_2010	34.991	93.219	3/17/10 16:49	1
38_2010	34.948	93.274	4/6/10 17:24	1
38_2010	35.446	93.082	5/24/10 16:50	2
38_2010	35.449	93.073	5/24/10 17:16	2
38_2010	35.514	92.572	6/1/10 17:08	3
38_2010	35.516	92.527	6/1/10 17:31	3
38_2010	35.513	92.545	6/1/10 19:21	1
38_2010	35.486	92.152	6/21/10 17:03	3
38_2010	35.497	92.143	6/21/10 17:19	3
38_2010	35.477	91.783	6/25/10 16:21	2
38_2010	35.45	91.824	6/29/10 15:57	1
38_2010	35.446	91.836	7/3/10 16:50	1
38_2010	35.365	93.197	7/23/10 16:33	2
38_2010	35.06	93.254	8/20/10 16:46	1
38_2010	34.841	93.321	8/28/10 16:58	1
38_2010	34.842	93.313	8/28/10 17:04	1
38_2010	34.963	93.291	9/17/10 19:22	1
38_2010	35.01	93.31	9/25/10 15:36	3
38_2010	35.001	93.245	9/29/10 16:35	2
38_2010	35.025	93.229	10/3/10 15:37	2
38_2010	34.963	93.311	10/7/10 16:53	3
38_2010	35.026	93.268	10/15/10 15:29	2
38_2010	35.005	93.253	10/19/10 16:28	2
38_2010	35.017	93.28	10/23/10 17:27	1
38_2010	35.007	93.266	10/27/10 16:47	2
38_2010	35.012	93.243	10/31/10 15:40	3
38_2010	35.028	93.226	10/31/10 17:22	2
38_2010	35.028	93.264	10/31/10 18:26	1
38_2010	35.022	93.261	11/8/10 17:35	1
38_2010	35.007	93.255	11/12/10 15:43	1
38_2010	35.031	93.269	12/2/10 15:34	1
39_2011	35.385	93.607	1/3/11 16:01	1
39_2011	35.385	93.612	1/3/11 19:25	1
39_2011	35.412	93.617	1/11/11 17:03	2
39_2011	35.405	93.622	1/15/11 17:12	1
39_2011	35.406	93.618	1/15/11 19:37	2
39_2011	35.416	93.593	1/23/11 17:28	2
39_2011	35.4	93.582	1/23/11 18:03	2
39_2011	35.419	93.625	1/31/11 18:11	1
39_2011	35.442	93.614	2/4/11 16:14	3
39_2011	35.447	93.643	2/12/11 16:30	1
39_2011	35.437	93.608	2/12/11 17:15	2
39_2011	35.489	93.796	2/24/11 16:47	2
39_2011	35.492	93.821	2/28/11 17:06	2
39_2011	35.404	93.574	3/12/11 16:42	1
39_2011	35.432	93.626	3/24/11 16:18	3
39_2011	35.396	93.576	4/5/11 16:21	1
39_2011	35.383	93.593	4/9/11 17:17	2
39_2011	35.366	93.544	4/13/11 19:18	1
39_2011	35.538	92.129	6/12/11 15:57	1
39_2011	35.624	92.267	6/16/11 16:48	2
39_2011	35.462	92.152	6/24/11 17:04	1
39_2011	35.43	91.852	6/28/11 16:21	3
39_2011	35.448	91.928	7/6/11 16:37	3
39_2011	35.461	91.891	7/10/11 17:36	3
39_2011	35.532	92.17	7/18/11 16:07	2
39_2011	35.54	92.186	7/18/11 16:12	2
39_2011	35.522	92.743	7/26/11 16:31	3
39_2011	35.389	93.275	7/30/11 17:19	2
39_2011	35.362	93.359	8/3/11 16:45	3
39_2011	35.277	93.275	8/7/11 15:55	3
39_2011	35.285	93.296	8/7/11 16:05	1
39_2011	35.385	93.6	8/11/11 17:06	2
39_2011	35.389	93.608	8/11/11 19:25	2
39_2011	35.447	93.626	8/15/11 16:10	3
39_2011	35.406	93.623	8/15/11 16:20	2
39_2011	35.407	93.613	8/15/11 17:49	3
39_2011	35.38	93.551	8/19/11 17:05	1
39_2011	35.365	93.614	8/19/11 19:30	1
39_2011	35.414	93.588	9/4/11 15:54	1
39_2011	35.401	93.583	9/4/11 16:11	1
39_2011	35.439	93.619	9/8/11 16:51	1
39_2011	35.433	93.594	9/12/11 17:48	1
39_2011	35.411	93.602	9/20/11 16:48	1
39_2011	35.416	93.595	9/20/11 18:18	3
39_2013	35.432	93.641	1/4/13 17:36	1
39_2013	35.439	93.625	1/8/13 16:29	2
39_2013	35.436	93.633	1/8/13 16:52	3
39_2013	35.444	93.631	1/8/13 18:33	1
39_2013	35.432	93.628	1/12/13 15:43	1
39_2013	35.445	93.576	1/12/13 16:08	2
39_2013	35.43	93.608	1/12/13 19:14	1
39_2013	35.44	93.626	1/20/13 18:01	3
39_2013	35.432	93.614	1/24/13 16:58	3
39_2013	35.426	93.584	1/24/13 19:21	1
39_2013	35.432	93.622	1/28/13 16:12	3
39_2013	35.429	93.609	1/28/13 18:11	1
39_2013	35.42	93.611	2/1/13 17:13	1
39_2013	35.472	93.552	2/1/13 19:10	1
39_2013	35.394	93.603	2/5/13 16:48	1
39_2013	35.387	93.58	2/5/13 18:23	1
39_2013	35.396	93.572	2/9/13 17:26	2
39_2013	35.393	93.576	2/9/13 17:44	1
39_2013	35.397	93.613	2/13/13 16:43	2
39_2013	35.395	93.598	2/13/13 16:59	3
39_2013	35.399	93.606	2/17/13 16:00	1
39_2013	35.397	93.607	2/17/13 16:13	2
39_2013	35.396	93.61	2/17/13 17:54	1
39_2013	35.4	93.603	2/17/13 17:58	2
39_2013	35.386	93.583	2/21/13 17:12	1
39_2013	35.384	93.607	2/25/13 16:14	2
39_2013	35.378	93.6	2/25/13 16:27	2
39_2013	35.392	93.584	3/1/13 15:35	1
39_2013	35.439	93.584	3/1/13 18:02	1
39_2013	35.386	93.617	3/5/13 16:30	3
39_2013	35.37	93.588	3/5/13 16:38	1
39_2013	35.387	93.624	3/5/13 18:09	2
39_2013	35.395	93.648	3/5/13 18:18	1
39_2013	35.375	93.509	3/9/13 15:46	1
39_2013	35.406	93.58	3/13/13 18:30	1
39_2013	35.377	93.565	3/21/13 18:17	1
39_2013	35.386	93.601	3/21/13 18:41	3
39_2013	35.393	93.575	3/25/13 16:16	1
39_2013	35.4	93.615	3/25/13 17:58	1
39_2013	35.392	93.547	3/25/13 18:19	1
39_2013	35.361	93.571	3/29/13 15:35	1
39_2013	35.37	93.58	3/29/13 17:13	3
39_2013	35.371	93.576	3/29/13 18:24	2
39_2013	35.392	93.596	4/2/13 16:31	3
39_2013	35.395	93.615	4/2/13 18:09	1
39_2013	35.388	93.589	4/2/13 18:26	3
39_2013	35.391	93.598	4/6/13 15:49	1
39_2013	35.392	93.588	4/6/13 19:07	1
39_2013	35.368	93.569	4/10/13 18:21	1
39_2013	35.385	93.629	4/10/13 18:28	2
39_2013	35.402	93.599	4/14/13 18:34	1
39_2013	35.4	93.652	4/18/13 16:52	1
39_2013	35.394	93.594	4/18/13 18:34	1
39_2013	35.406	93.642	4/18/13 18:35	1
39_2013	35.384	93.608	4/22/13 16:14	1
39_2013	35.383	93.621	4/22/13 17:50	1
39_2013	35.39	93.607	4/22/13 18:38	2
39_2013	35.391	93.641	4/26/13 15:36	1
39_2013	35.386	93.628	4/26/13 17:12	2
39_2013	35.394	93.627	4/26/13 18:40	3
39_2013	35.374	93.577	4/30/13 16:30	1
39_2013	35.381	93.581	4/30/13 18:01	2
39_2013	35.381	93.569	4/30/13 18:41	2
39_2013	35.383	93.558	5/4/13 17:29	2
39_2013	35.405	93.573	5/4/13 18:45	2
39_2013	35.392	93.541	5/4/13 18:57	2
39_2013	35.428	93.602	5/8/13 16:45	1
39_2013	35.425	93.595	5/8/13 18:11	1
39_2013	35.286	93.251	5/12/13 17:28	1
39_2013	35.279	93.247	5/12/13 18:48	3
39_2013	35.286	93.238	5/12/13 19:09	2
39_2013	35.399	93.194	5/16/13 16:59	2
39_2013	35.415	93.204	5/16/13 18:49	1
39_2013	35.535	92.948	5/20/13 16:15	1
39_2013	35.52	92.785	5/24/13 16:57	2
39_2013	35.546	92.775	5/24/13 17:15	1
39_2013	35.533	92.836	5/24/13 18:36	1
39_2013	35.525	92.795	5/24/13 18:57	1
39_2013	35.56	92.735	5/28/13 17:52	1
39_2013	35.567	92.546	6/1/13 17:08	1
39_2013	35.575	92.553	6/1/13 17:28	2
39_2013	35.569	92.536	6/1/13 18:46	2
39_2013	35.572	92.47	6/5/13 18:02	1
39_2013	35.567	92.45	6/5/13 19:03	1
39_2013	35.596	92.376	6/9/13 18:59	2
39_2013	35.568	92.405	6/13/13 18:16	3
39_2013	35.571	92.398	6/13/13 19:09	1
39_2013	35.572	92.382	6/17/13 16:15	2
39_2013	35.571	92.384	6/17/13 17:30	1
39_2013	35.568	92.374	6/17/13 19:09	2
39_2013	35.512	92.11	6/21/13 15:35	1
39_2013	35.518	92.13	6/21/13 17:14	2
39_2013	35.512	92.102	6/21/13 19:14	2
39_2013	35.474	92.016	6/25/13 16:29	1
39_2013	35.492	92.014	6/25/13 19:25	1
39_2013	35.468	92.02	6/29/13 15:46	2
39_2013	35.473	92.028	6/29/13 18:37	2
39_2013	35.464	92.004	7/3/13 16:46	2
39_2013	35.433	91.827	7/7/13 17:09	3
39_2013	35.424	91.815	7/7/13 18:50	1
39_2013	35.424	91.809	7/11/13 17:00	2
39_2013	35.421	91.798	7/11/13 18:05	2
39_2013	35.511	92.24	7/15/13 17:24	3
39_2013	35.504	92.473	7/19/13 18:17	2
39_2013	35.502	92.471	7/19/13 19:27	1
39_2013	35.502	92.778	7/23/13 16:29	1
39_2013	35.511	92.795	7/23/13 17:31	2
39_2013	35.517	92.82	7/23/13 17:51	1
39_2013	35.424	93.162	7/27/13 15:45	2
39_2013	35.358	93.266	7/31/13 16:43	3
39_2013	35.276	93.188	8/4/13 17:44	1
39_2013	35.282	93.197	8/4/13 18:42	2
39_2013	35.398	93.612	8/8/13 16:58	2
39_2013	35.395	93.602	8/8/13 17:59	2
39_2013	35.392	93.633	8/12/13 16:14	3
39_2013	35.39	93.621	8/12/13 17:15	2
39_2013	35.396	93.619	8/12/13 18:53	3
39_2013	35.411	93.619	8/16/13 15:34	3
39_2013	35.411	93.616	8/16/13 18:09	3
39_2013	35.39	93.625	8/20/13 16:30	2
39_2013	35.387	93.615	8/20/13 17:25	3
39_2013	35.388	93.628	8/20/13 19:04	2
39_2013	35.394	93.622	8/24/13 17:26	1
39_2013	35.402	93.594	8/28/13 16:43	2
39_2013	35.399	93.582	8/28/13 17:35	1
39_2013	35.397	93.591	8/28/13 18:10	1
39_2013	35.383	93.572	9/1/13 17:41	2
39_2013	35.403	93.593	9/1/13 18:31	2
39_2013	35.384	93.617	9/5/13 16:58	1
39_2013	35.394	93.595	9/13/13 17:12	2
39_2013	35.405	93.609	9/17/13 16:26	1
39_2013	35.396	93.605	9/17/13 18:20	2
39_2013	35.399	93.608	9/17/13 18:53	2
39_2013	35.436	93.622	9/21/13 17:25	1
39_2013	35.41	93.592	9/29/13 16:41	1
39_2013	35.394	93.583	9/29/13 18:27	1
39_2013	35.414	93.582	10/3/13 16:57	2
39_2013	35.41	93.611	10/7/13 16:10	2
39_2013	35.397	93.594	10/11/13 15:32	1
39_2013	35.399	93.601	10/11/13 17:11	1
39_2013	35.401	93.596	10/11/13 17:48	3
39_2013	35.401	93.599	10/15/13 17:04	2
39_2013	35.398	93.585	10/15/13 18:35	1
39_2013	35.386	93.608	10/19/13 18:37	2
39_2013	35.397	93.608	10/23/13 16:40	1
39_2013	35.405	93.614	10/23/13 17:15	2
39_2013	35.376	93.536	10/27/13 18:10	1
39_2013	35.393	93.672	10/31/13 17:24	1
39_2013	35.397	93.686	10/31/13 19:06	1
39_2013	35.391	93.625	11/8/13 17:37	1
39_2013	35.405	93.6	11/20/13 16:38	1
39_2013	35.398	93.568	11/20/13 17:03	1
39_2013	35.395	93.597	11/28/13 16:52	1
39_2013	35.386	93.566	11/28/13 18:52	1
39_2013	35.395	93.568	12/6/13 17:05	2
39_2013	35.403	93.595	12/10/13 16:41	2
39_2013	35.373	93.585	12/18/13 16:33	1
40_2011	35.333	93.503	1/3/11 15:58	1
40_2011	35.354	93.506	1/3/11 16:44	3
40_2011	35.356	93.517	1/3/11 17:40	1
40_2011	35.364	93.517	1/7/11 16:58	3
40_2011	35.36	93.514	1/7/11 19:28	3
40_2011	35.376	93.535	1/11/11 17:01	2
40_2011	35.375	93.534	1/11/11 19:34	3
40_2011	35.367	93.527	1/15/11 15:34	2
40_2011	35.366	93.539	1/15/11 16:18	2
40_2011	35.365	93.544	1/15/11 17:12	1
40_2011	35.365	93.541	1/15/11 19:36	3
40_2011	35.36	93.547	1/19/11 15:38	2
40_2011	35.363	93.55	1/19/11 17:19	1
40_2011	35.359	93.541	1/19/11 19:40	2
40_2011	35.384	93.51	1/23/11 14:58	1
40_2011	35.366	93.537	1/27/11 16:44	2
40_2011	35.379	93.518	1/31/11 15:16	1
40_2011	35.371	93.524	1/31/11 16:01	2
40_2011	35.343	93.513	2/4/11 16:13	2
40_2011	35.35	93.498	2/4/11 19:56	1
40_2011	35.355	93.529	2/8/11 15:30	1
40_2011	35.365	93.521	2/8/11 16:18	1
40_2011	35.351	93.524	2/12/11 16:07	2
40_2011	35.356	93.524	2/12/11 17:14	1
40_2011	35.494	93.766	2/20/11 15:06	1
40_2011	35.502	93.783	2/20/11 16:48	1
40_2011	35.511	93.754	2/20/11 17:29	2
40_2011	35.498	93.706	2/20/11 18:30	1
40_2011	35.503	93.782	2/28/11 16:03	1
40_2011	35.503	93.792	2/28/11 18:38	1
40_2011	35.494	93.768	3/4/11 14:44	2
40_2011	35.312	93.518	3/8/11 18:01	1
40_2011	35.341	93.571	3/8/11 18:47	1
40_2011	35.347	93.503	3/12/11 16:42	2
40_2011	35.351	93.49	3/12/11 17:15	2
40_2011	35.357	93.527	3/20/11 17:30	1
40_2011	35.35	93.509	3/24/11 16:16	2
40_2011	35.347	93.518	3/24/11 16:50	2
40_2011	35.356	93.485	3/28/11 15:36	1
40_2011	35.36	93.498	3/28/11 16:02	3
40_2011	35.342	93.518	4/1/11 16:33	3
40_2011	35.339	93.516	4/1/11 17:01	3
40_2011	35.342	93.514	4/1/11 19:06	3
40_2011	35.364	93.525	4/9/11 17:20	1
40_2011	35.351	93.512	4/9/11 19:13	3
40_2011	35.35	93.472	4/13/11 16:08	1
40_2011	35.523	92.497	5/31/11 16:12	1
40_2011	35.515	92.446	5/31/11 16:22	1
40_2011	35.495	92.405	5/31/11 18:02	2
40_2011	35.584	92.293	6/4/11 17:20	2
40_2011	35.591	92.288	6/8/11 16:31	2
40_2011	35.607	92.252	6/8/11 18:18	2
40_2011	35.509	92.234	6/12/11 15:47	2
40_2011	35.538	92.261	6/12/11 17:28	1
40_2011	35.531	92.272	6/12/11 17:33	1
40_2011	35.681	92.355	6/16/11 16:46	1
40_2011	35.68	92.36	6/16/11 16:51	2
40_2011	35.671	92.343	6/16/11 18:38	2
40_2011	35.589	92.284	6/24/11 17:04	2
40_2011	35.59	92.29	6/24/11 17:06	3
40_2011	35.576	92.304	6/24/11 18:45	1
40_2011	35.492	92.26	6/28/11 16:20	1
40_2011	35.486	92.249	6/28/11 16:22	1
40_2011	35.487	92.248	6/28/11 18:47	3
40_2011	35.476	92.259	7/2/11 15:39	2
40_2011	35.474	92.26	7/2/11 15:40	2
40_2011	35.472	92.262	7/2/11 17:21	3
40_2011	35.491	92.935	7/6/11 16:38	2
40_2011	35.667	93.551	7/10/11 14:16	1
40_2011	35.682	93.564	7/10/11 15:54	2
40_2011	35.693	93.563	7/10/11 17:33	1
40_2011	35.711	93.508	7/14/11 15:16	1
40_2011	35.68	93.541	7/14/11 16:50	2
40_2011	35.678	93.558	7/14/11 16:57	2
40_2011	35.585	93.665	7/18/11 17:49	1
40_2011	35.588	93.639	7/18/11 19:04	1
40_2011	35.652	93.591	7/22/11 15:32	3
40_2011	35.659	93.599	7/22/11 17:06	3
40_2011	35.66	93.599	7/22/11 17:11	1
40_2011	35.572	93.534	7/26/11 14:50	1
40_2011	35.571	93.558	7/26/11 16:22	1
40_2011	35.579	93.56	7/26/11 16:28	2
40_2011	35.579	93.526	7/26/11 19:10	3
40_2011	35.593	93.593	7/30/11 17:19	2
40_2011	35.591	93.589	7/30/11 19:16	3
40_2011	35.416	93.525	8/3/11 15:06	2
40_2011	35.412	93.53	8/3/11 16:45	1
40_2011	35.389	93.454	8/7/11 16:05	1
40_2011	35.392	93.457	8/7/11 17:35	1
40_2011	35.391	93.464	8/7/11 19:21	1
40_2011	35.381	93.623	8/11/11 15:21	2
40_2011	35.376	93.64	8/11/11 17:04	1
40_2011	35.392	93.629	8/15/11 16:23	1
40_2011	35.397	93.636	8/15/11 17:49	1
40_2011	35.35	93.542	8/23/11 16:37	1
40_2011	35.343	93.553	8/27/11 17:18	1
40_2011	35.326	93.55	8/31/11 15:17	2
40_2011	35.327	93.544	8/31/11 16:36	1
40_2011	35.338	93.56	8/31/11 16:54	1
40_2011	35.33	93.556	9/4/11 15:55	2
40_2011	35.337	93.56	9/4/11 16:16	2
40_2011	35.36	93.542	9/4/11 17:34	3
40_2011	35.342	93.538	9/8/11 15:31	2
40_2011	35.341	93.524	9/8/11 16:50	1
40_2011	35.355	93.533	9/8/11 17:12	1
40_2011	35.348	93.523	9/12/11 13:54	1
40_2011	35.35	93.501	9/12/11 16:08	1
40_2011	35.354	93.489	9/16/11 17:06	1
40_2011	35.36	93.476	9/16/11 18:16	2
40_2011	35.345	93.562	9/20/11 15:08	1
40_2011	35.346	93.554	9/20/11 16:22	2
40_2011	35.353	93.565	9/20/11 18:19	1
40_2011	35.332	93.55	9/24/11 16:05	1
40_2011	35.328	93.554	9/24/11 17:19	1
40_2011	35.344	93.538	9/24/11 18:24	1
40_2011	35.341	93.52	9/28/11 15:25	2
40_2011	35.345	93.512	9/28/11 16:36	1
40_2011	35.349	93.513	9/28/11 18:24	1
41_2011	35.351	93.551	1/7/11 16:59	1
41_2011	35.351	93.555	1/11/11 17:01	2
41_2011	35.351	93.562	1/15/11 16:20	3
41_2011	35.349	93.569	1/19/11 19:40	2
41_2011	35.353	93.554	1/23/11 16:38	3
41_2011	35.358	93.553	1/23/11 17:29	2
41_2011	35.36	93.561	1/27/11 19:48	2
41_2011	35.351	93.57	1/31/11 16:02	2
41_2011	35.376	93.568	1/31/11 16:53	1
41_2011	35.366	93.551	2/4/11 16:15	1
41_2011	35.347	93.536	2/8/11 15:32	2
41_2011	35.358	93.567	2/8/11 17:13	2
41_2011	35.32	93.527	2/12/11 14:51	1
41_2011	35.355	93.591	2/12/11 16:32	1
41_2011	35.347	93.552	2/12/11 17:15	1
41_2011	35.466	93.653	2/20/11 17:29	2
41_2011	35.469	93.646	2/20/11 18:30	2
41_2011	35.448	93.662	2/20/11 20:08	1
41_2011	35.486	93.794	2/28/11 16:05	2
41_2011	35.426	93.747	3/4/11 16:25	3
41_2011	35.419	93.756	3/4/11 17:03	2
41_2011	35.418	93.754	3/4/11 20:21	1
41_2011	35.348	93.576	3/28/11 15:34	3
41_2011	35.358	93.55	4/1/11 14:54	2
41_2011	35.362	93.56	4/1/11 17:02	1
41_2011	35.356	93.54	4/5/11 16:21	2
41_2011	35.357	93.526	4/9/11 16:51	1
41_2011	35.355	93.515	4/9/11 19:14	2
41_2011	35.352	93.56	4/13/11 16:09	2
41_2011	35.358	93.545	4/13/11 19:18	1
41_2011	35.459	93.087	5/31/11 16:12	2
41_2011	35.539	92.757	6/4/11 17:21	3
41_2011	35.558	92.512	6/8/11 16:29	2
41_2011	35.596	92.347	6/12/11 15:45	1
41_2011	35.604	92.357	6/12/11 18:34	1
41_2011	35.613	92.361	6/12/11 20:12	2
41_2011	35.644	92.376	6/16/11 15:06	3
41_2011	35.64	92.379	6/16/11 16:46	3
41_2011	35.645	92.379	6/16/11 16:50	1
41_2011	35.64	92.378	6/16/11 18:36	3
41_2011	35.663	92.402	6/20/11 16:04	2
41_2011	35.656	92.399	6/20/11 16:08	2
41_2011	35.628	92.343	6/24/11 15:24	3
41_2011	35.63	92.337	6/24/11 17:05	1
41_2011	35.632	92.333	6/24/11 17:08	1
41_2011	35.549	92.202	6/28/11 16:19	2
41_2011	35.536	92.166	6/28/11 18:47	3
41_2011	35.483	91.847	7/2/11 15:39	2
41_2011	35.51	91.825	7/2/11 17:19	1
41_2011	35.481	91.846	7/2/11 18:49	1
41_2011	35.488	91.839	7/6/11 16:37	1
41_2011	35.49	91.843	7/6/11 16:38	2
41_2011	35.485	91.841	7/6/11 18:53	1
41_2011	35.499	92.158	7/10/11 15:53	3
41_2011	35.501	92.157	7/10/11 17:35	2
41_2011	35.501	92.162	7/10/11 18:56	1
41_2011	35.535	92.334	7/14/11 15:15	1
41_2011	35.53	92.331	7/14/11 16:50	1
41_2011	35.528	92.335	7/14/11 16:57	2
41_2011	35.505	92.777	7/18/11 16:08	2
41_2011	35.515	92.769	7/18/11 16:11	2
41_2011	35.501	92.783	7/18/11 17:50	1
41_2011	35.348	93.307	7/22/11 17:05	3
41_2011	35.35	93.331	7/22/11 19:08	1
41_2011	35.372	93.289	7/26/11 16:27	1
41_2011	35.34	93.254	7/26/11 18:03	2
41_2011	35.345	93.269	7/26/11 19:10	2
41_2011	35.283	93.204	7/30/11 15:48	1
41_2011	35.286	93.199	7/30/11 19:13	2
41_2011	35.444	94.023	8/7/11 16:06	3
41_2011	35.451	94.006	8/11/11 15:24	1
41_2011	35.442	94.01	8/11/11 16:51	1
41_2011	35.458	94.017	8/11/11 17:05	3
41_2011	35.453	94.042	8/11/11 19:24	1
41_2011	35.459	94.03	8/15/11 16:07	1
41_2011	35.425	93.984	8/19/11 15:41	1
41_2011	35.457	94.02	8/23/11 14:58	2
41_2011	35.456	94.015	8/27/11 15:55	1
41_2011	35.455	94.059	8/27/11 17:20	1
41_2011	35.424	93.977	8/31/11 15:16	2
41_2011	35.416	93.919	8/31/11 16:37	1
41_2011	35.424	93.975	8/31/11 19:41	1
41_2011	35.46	94.037	9/4/11 16:13	1
41_2011	35.459	94.029	9/4/11 17:33	3
41_2011	35.45	94.022	9/4/11 19:43	1
41_2011	35.468	94.025	9/8/11 15:32	2
41_2011	35.456	94.026	9/8/11 16:51	2
41_2011	35.463	94.024	9/8/11 19:47	2
41_2011	35.428	93.924	9/12/11 14:52	2
41_2011	35.418	93.917	9/12/11 16:32	2
41_2011	35.421	93.919	9/12/11 17:48	1
41_2011	35.434	93.934	9/12/11 18:13	2
41_2011	35.42	93.97	9/16/11 17:05	2
41_2011	35.415	93.939	9/16/11 18:15	2
41_2011	35.458	94.03	9/20/11 15:06	2
41_2011	35.456	94.019	9/20/11 16:22	1
41_2011	35.466	94.047	9/20/11 16:47	1
41_2011	35.486	94.046	9/20/11 18:02	1
41_2011	35.462	94.049	9/20/11 18:20	2
41_2011	35.442	94.031	9/24/11 16:05	2
41_2011	35.448	94.028	9/24/11 17:21	2
41_2011	35.418	93.989	9/28/11 15:23	2
41_2011	35.406	93.957	9/28/11 17:04	1
44_2011	35.141	94.074	1/3/11 15:58	3
44_2011	35.134	94.079	1/3/11 19:26	3
44_2011	35.146	94.002	1/7/11 16:01	1
44_2011	35.142	94.004	1/7/11 17:00	2
44_2011	35.148	93.964	1/7/11 19:28	2
44_2011	35.137	93.986	1/11/11 15:20	3
44_2011	35.123	93.964	1/11/11 19:32	1
44_2011	35.128	93.973	1/15/11 16:20	2
44_2011	35.133	93.979	1/15/11 17:15	3
44_2011	35.133	93.976	1/15/11 19:36	3
44_2011	35.156	94.026	1/19/11 15:40	2
44_2011	35.152	94.009	1/19/11 19:40	2
44_2011	35.12	93.993	1/23/11 14:59	1
44_2011	35.131	93.971	1/23/11 15:47	1
44_2011	35.13	93.974	1/23/11 16:37	2
44_2011	35.151	93.929	1/27/11 15:55	1
44_2011	35.153	93.954	1/27/11 16:46	2
44_2011	35.155	93.931	1/27/11 18:09	2
44_2011	35.182	93.924	1/31/11 15:16	1
44_2011	35.17	93.922	1/31/11 16:01	3
44_2011	35.172	93.921	1/31/11 16:55	3
44_2011	35.176	93.939	2/4/11 16:15	3
44_2011	35.164	93.952	2/4/11 17:02	2
44_2011	35.185	93.906	2/8/11 15:31	1
44_2011	35.177	93.878	2/8/11 16:17	1
44_2011	35.183	93.907	2/12/11 15:34	2
44_2011	35.179	93.91	2/12/11 16:32	1
44_2011	35.216	93.903	2/16/11 18:27	2
44_2011	35.185	93.978	2/20/11 15:08	3
44_2011	35.179	93.957	2/20/11 18:30	1
44_2011	35.193	93.981	2/24/11 16:47	1
44_2011	35.162	94.016	2/28/11 15:26	3
44_2011	35.151	94.058	3/4/11 14:44	1
44_2011	35.134	94.03	3/4/11 16:23	1
44_2011	35.144	94.058	3/4/11 17:00	2
44_2011	35.124	93.959	3/8/11 16:18	1
44_2011	35.12	93.94	3/8/11 18:46	1
44_2011	35.139	93.99	3/12/11 15:01	2
44_2011	35.144	94	3/12/11 15:36	3
44_2011	35.143	93.997	3/12/11 16:42	1
44_2011	35.144	94.005	3/12/11 18:49	1
44_2011	35.125	93.959	3/16/11 18:53	1
44_2011	35.156	93.963	3/20/11 15:18	3
44_2011	35.159	93.981	3/20/11 17:01	2
44_2011	35.157	93.967	3/20/11 17:33	3
44_2011	35.153	93.925	3/24/11 16:19	2
44_2011	35.17	93.904	3/28/11 15:34	3
44_2011	35.171	93.909	3/28/11 16:03	2
44_2011	35.173	93.922	3/28/11 19:04	1
44_2011	35.169	93.923	4/1/11 17:02	3
44_2011	35.169	93.927	4/1/11 19:07	3
44_2011	35.146	93.979	4/5/11 16:21	1
44_2011	35.144	93.964	4/5/11 19:09	3
44_2011	35.155	94.047	4/9/11 16:51	2
44_2011	35.16	94.052	4/9/11 17:17	3
44_2011	35.133	94.069	4/13/11 16:08	1
44_2011	35.151	94.109	4/13/11 16:35	1
44_2011	35.096	94.248	5/31/11 16:12	2
44_2011	35.095	94.241	5/31/11 16:21	2
44_2011	35.095	94.243	6/4/11 15:30	3
44_2011	35.19	93.68	6/8/11 16:27	2
44_2011	35.195	93.675	6/8/11 18:28	2
44_2011	35.238	93.172	6/12/11 13:56	1
44_2011	35.249	93.16	6/12/11 15:46	2
44_2011	35.272	93.152	6/12/11 17:36	1
44_2011	35.465	92.995	6/16/11 16:44	1
44_2011	35.466	92.983	6/16/11 16:50	2
44_2011	35.512	92.479	6/20/11 16:03	1
44_2011	35.479	92.274	6/24/11 17:02	2
44_2011	35.479	92.276	6/24/11 17:05	2
44_2011	35.482	92.273	6/24/11 18:44	3
44_2011	35.502	91.989	6/28/11 16:21	2
44_2011	35.495	91.981	6/28/11 16:25	2
44_2011	35.497	91.962	6/28/11 18:47	1
44_2011	35.471	91.919	7/2/11 15:39	3
44_2011	35.47	91.902	7/2/11 18:50	1
44_2011	35.478	91.891	7/6/11 14:56	2
44_2011	35.474	91.891	7/6/11 16:37	2
44_2011	35.474	91.893	7/6/11 16:37	3
44_2011	35.473	91.881	7/6/11 18:53	2
44_2011	35.478	92.046	7/10/11 15:52	2
44_2011	35.47	92.047	7/10/11 17:34	2
44_2011	35.507	92.151	7/14/11 15:15	2
44_2011	35.507	92.194	7/18/11 16:07	1
44_2011	35.504	92.195	7/18/11 16:12	3
44_2011	35.501	92.198	7/18/11 17:50	1
44_2011	35.506	92.343	7/22/11 15:31	3
44_2011	35.507	92.344	7/22/11 17:05	2
44_2011	35.505	92.36	7/22/11 19:07	1
44_2011	35.503	92.715	7/26/11 13:47	2
44_2011	35.502	92.714	7/26/11 14:51	3
44_2011	35.496	92.707	7/26/11 16:23	2
44_2011	35.506	92.718	7/26/11 16:30	3
44_2011	35.446	93.066	7/30/11 15:40	2
44_2011	35.45	93.092	7/30/11 15:48	1
44_2011	35.424	93.125	7/30/11 19:13	2
44_2011	35.374	93.266	8/3/11 15:07	3
44_2011	35.378	93.272	8/3/11 16:47	2
44_2011	35.377	93.27	8/3/11 19:17	2
44_2011	35.232	93.562	8/7/11 15:52	1
44_2011	35.225	93.548	8/7/11 16:05	2
44_2011	35.234	93.595	8/7/11 19:22	1
44_2011	35.097	94.165	8/11/11 15:22	2
44_2011	35.078	94.161	8/11/11 16:50	1
44_2011	35.082	94.199	8/11/11 19:23	2
44_2011	35.081	94.211	8/15/11 16:06	2
44_2011	35.085	94.202	8/15/11 16:22	3
44_2011	35.085	94.205	8/15/11 19:27	2
44_2011	35.082	94.193	8/19/11 13:50	1
44_2011	35.076	94.181	8/19/11 15:39	1
44_2011	35.079	94.19	8/19/11 17:05	3
44_2011	35.077	94.2	8/19/11 19:30	1
44_2011	35.067	94.205	8/23/11 14:04	1
44_2011	35.064	94.184	8/23/11 14:58	3
44_2011	35.069	94.197	8/23/11 16:24	2
44_2011	35.073	94.202	8/23/11 16:38	1
44_2011	35.072	94.173	8/27/11 15:57	1
44_2011	35.077	94.194	8/27/11 17:19	3
44_2011	35.065	94.188	8/31/11 15:15	2
44_2011	35.073	94.227	9/4/11 16:15	1
44_2011	35.077	94.218	9/4/11 17:33	1
44_2011	35.078	94.211	9/8/11 15:30	2
44_2011	35.068	94.224	9/8/11 18:09	2
44_2011	35.061	94.187	9/12/11 14:51	1
44_2011	35.066	94.185	9/12/11 16:08	2
44_2011	35.069	94.203	9/12/11 16:29	1
44_2011	35.077	94.232	9/16/11 17:04	1
44_2011	35.079	94.204	9/20/11 18:19	3
44_2011	35.081	94.226	9/24/11 16:03	1
44_2011	35.071	94.219	9/24/11 18:22	1
44_2011	35.079	94.248	9/28/11 15:22	2
44_2011	35.074	94.239	9/28/11 16:37	2
44_2011	35.074	94.241	9/28/11 18:26	2
44_2013	35.118	94.011	1/4/13 13:24	2
44_2013	35.123	94.01	1/4/13 15:30	2
44_2013	35.123	94.017	1/4/13 17:38	1
44_2013	35.131	93.996	1/8/13 18:32	2
44_2013	35.128	94.004	1/8/13 19:11	1
44_2013	35.128	94.023	1/12/13 15:44	1
44_2013	35.115	94.008	1/16/13 14:15	1
44_2013	35.107	93.976	1/16/13 15:02	2
44_2013	35.112	93.993	1/16/13 16:43	3
44_2013	35.112	93.998	1/16/13 17:04	2
44_2013	35.123	93.999	1/20/13 16:00	1
44_2013	35.131	93.986	1/24/13 16:56	1
44_2013	35.13	94.006	1/24/13 17:17	1
44_2013	35.126	94.01	1/28/13 16:12	1
44_2013	35.126	94.004	2/1/13 13:44	2
44_2013	35.13	94.019	2/1/13 15:28	1
44_2013	35.161	93.972	2/1/13 17:11	1
44_2013	35.128	94.011	2/5/13 16:28	3
44_2013	35.146	94.01	2/13/13 15:03	2
44_2013	35.144	94.013	2/13/13 16:58	3
44_2013	35.129	94.024	2/17/13 13:14	1
44_2013	35.132	94.027	2/17/13 13:15	3
44_2013	35.129	94.032	2/17/13 16:00	2
44_2013	35.131	94.037	2/21/13 13:30	2
44_2013	35.118	94.021	2/21/13 15:19	2
44_2013	35.128	94.026	2/21/13 17:10	3
44_2013	35.152	94.046	2/25/13 13:17	2
44_2013	35.15	94.04	2/25/13 16:14	3
44_2013	35.147	94.045	2/25/13 16:25	3
44_2013	35.12	94.014	3/1/13 14:05	2
44_2013	35.118	94.018	3/5/13 13:20	1
44_2013	35.122	94.002	3/5/13 14:48	2
44_2013	35.123	94.003	3/5/13 16:29	2
44_2013	35.119	94.011	3/5/13 16:36	2
44_2013	35.122	94.012	3/5/13 18:07	2
44_2013	35.101	93.998	3/9/13 15:48	1
44_2013	35.099	94.01	3/13/13 13:16	3
44_2013	35.097	94.017	3/13/13 15:04	2
44_2013	35.099	94.018	3/13/13 16:45	2
44_2013	35.097	94.014	3/13/13 16:50	3
44_2013	35.117	94.004	3/17/13 13:33	2
44_2013	35.118	93.999	3/17/13 16:01	2
44_2013	35.118	94.012	3/17/13 17:47	2
44_2013	35.123	94.017	3/21/13 13:28	1
44_2013	35.118	94.018	3/21/13 15:20	3
44_2013	35.13	94.002	3/21/13 17:00	1
44_2013	35.128	94.016	3/21/13 17:03	1
44_2013	35.125	94.01	3/25/13 14:37	1
44_2013	35.129	94.03	3/25/13 16:15	1
44_2013	35.122	94.021	3/25/13 17:58	3
44_2013	35.122	94.024	3/25/13 18:21	3
44_2013	35.137	94.02	3/29/13 17:13	2
44_2013	35.121	94.02	3/29/13 18:23	2
44_2013	35.144	94.035	4/2/13 16:29	1
44_2013	35.134	94.027	4/2/13 18:10	2
44_2013	35.133	94.027	4/2/13 18:25	3
44_2013	35.094	94.037	4/6/13 13:19	3
44_2013	35.098	94.033	4/6/13 13:34	2
44_2013	35.1	94.024	4/6/13 15:47	1
44_2013	35.1	94.036	4/6/13 17:24	1
44_2013	35.113	94.035	4/10/13 13:37	2
44_2013	35.119	94.026	4/10/13 15:04	3
44_2013	35.117	94.045	4/10/13 16:45	2
44_2013	35.112	94.029	4/10/13 18:20	2
44_2013	35.128	94.023	4/14/13 16:00	2
44_2013	35.135	94.018	4/18/13 15:20	3
44_2013	35.133	94.026	4/18/13 16:53	3
44_2013	35.142	94.018	4/18/13 18:33	1
44_2013	35.154	94.143	4/22/13 16:15	1
44_2013	35.155	94.147	4/22/13 17:48	2
44_2013	35.153	94.138	4/22/13 18:36	3
44_2013	35.087	94.256	4/26/13 15:34	3
44_2013	35.095	94.27	4/26/13 17:05	1
44_2013	35.089	94.251	4/26/13 18:40	2
44_2013	35.093	94.272	4/30/13 13:24	3
44_2013	35.096	94.274	4/30/13 18:00	3
44_2013	35.098	94.242	5/4/13 13:41	1
44_2013	35.108	94.265	5/4/13 17:16	2
44_2013	35.104	94.263	5/4/13 18:45	2
44_2013	35.094	94.249	5/8/13 13:11	2
44_2013	35.091	94.24	5/8/13 13:59	1
44_2013	35.101	94.235	5/8/13 15:04	1
44_2013	35.1	94.251	5/8/13 16:44	1
44_2013	35.109	94.139	5/12/13 13:28	2
44_2013	35.134	94.121	5/12/13 16:02	1
44_2013	35.142	94.061	5/12/13 17:29	2
44_2013	35.157	94.045	5/12/13 18:49	2
44_2013	35.21	94.039	5/16/13 13:48	1
44_2013	35.207	94.018	5/16/13 15:21	3
44_2013	35.2	94	5/16/13 17:00	3
44_2013	35.212	94.014	5/16/13 18:24	2
44_2013	35.224	93.588	5/20/13 13:10	3
44_2013	35.236	93.582	5/20/13 16:16	1
44_2013	35.409	93.198	5/24/13 13:27	3
44_2013	35.406	93.192	5/24/13 15:33	2
44_2013	35.404	93.187	5/24/13 16:55	3
44_2013	35.484	92.953	5/28/13 13:08	1
44_2013	35.487	92.943	5/28/13 13:44	2
44_2013	35.494	92.941	5/28/13 16:31	2
44_2013	35.491	92.943	5/28/13 17:52	2
44_2013	35.489	92.935	5/28/13 18:58	2
44_2013	35.495	92.527	6/1/13 13:15	2
44_2013	35.488	92.514	6/1/13 15:47	2
44_2013	35.486	92.519	6/1/13 17:08	2
44_2013	35.486	92.524	6/1/13 18:50	2
44_2013	35.484	92.485	6/5/13 13:10	1
44_2013	35.494	92.477	6/5/13 13:32	2
44_2013	35.487	92.488	6/5/13 15:03	1
44_2013	35.508	92.505	6/5/13 16:45	1
44_2013	35.484	92.274	6/9/13 17:20	2
44_2013	35.491	92.28	6/9/13 17:43	1
44_2013	35.472	92.285	6/13/13 13:12	2
44_2013	35.462	92.291	6/13/13 15:21	2
44_2013	35.466	92.288	6/17/13 13:30	2
44_2013	35.468	92.278	6/17/13 16:15	2
44_2013	35.466	92.266	6/17/13 17:29	2
44_2013	35.467	92.277	6/21/13 13:15	3
44_2013	35.464	92.27	6/21/13 13:47	2
44_2013	35.463	92.274	6/21/13 15:33	2
44_2013	35.491	92.268	6/25/13 13:19	1
44_2013	35.494	92.239	6/25/13 16:31	1
44_2013	35.459	91.88	6/29/13 15:46	1
44_2013	35.456	91.886	7/3/13 15:03	2
44_2013	35.468	91.895	7/3/13 16:44	1
44_2013	35.489	92.07	7/7/13 13:16	2
44_2013	35.493	92.066	7/7/13 13:22	3
44_2013	35.483	92.047	7/7/13 16:00	1
44_2013	35.486	92.074	7/7/13 17:10	2
44_2013	35.484	92.336	7/11/13 13:34	2
44_2013	35.488	92.337	7/11/13 15:19	2
44_2013	35.489	92.33	7/11/13 16:59	2
44_2013	35.494	92.331	7/11/13 18:06	2
44_2013	35.491	92.35	7/15/13 13:07	3
44_2013	35.488	92.355	7/15/13 13:27	1
44_2013	35.496	92.347	7/15/13 13:50	2
44_2013	35.491	92.351	7/15/13 16:15	1
44_2013	35.502	92.576	7/19/13 13:23	1
44_2013	35.502	92.594	7/19/13 15:34	1
44_2013	35.5	92.617	7/19/13 17:13	2
44_2013	35.51	92.628	7/19/13 18:16	1
44_2013	35.473	92.983	7/23/13 13:29	2
44_2013	35.464	92.976	7/23/13 16:28	1
44_2013	35.363	93.269	7/27/13 13:05	1
44_2013	35.368	93.255	7/27/13 15:45	2
44_2013	35.363	93.237	7/31/13 13:20	3
44_2013	35.365	93.232	7/31/13 13:30	2
44_2013	35.363	93.234	7/31/13 15:03	2
44_2013	35.375	93.222	7/31/13 16:44	2
44_2013	35.273	93.384	8/4/13 13:36	2
44_2013	35.166	93.917	8/8/13 13:34	3
44_2013	35.156	93.918	8/8/13 13:55	1
44_2013	35.166	93.93	8/8/13 15:18	3
44_2013	35.083	94.193	8/12/13 16:14	2
44_2013	35.081	94.196	8/12/13 17:11	1
44_2013	35.075	94.191	8/16/13 15:33	3
44_2013	35.075	94.192	8/20/13 13:07	2
44_2013	35.082	94.209	8/20/13 16:28	1
44_2013	35.075	94.191	8/20/13 17:24	1
44_2013	35.081	94.194	8/24/13 13:23	3
44_2013	35.084	94.21	8/24/13 18:19	1
44_2013	35.073	94.194	8/28/13 13:41	2
44_2013	35.08	94.209	8/28/13 17:33	2
44_2013	35.065	94.197	8/28/13 18:10	2
44_2013	35.074	94.204	9/1/13 13:13	3
44_2013	35.078	94.196	9/1/13 13:59	1
44_2013	35.06	94.174	9/1/13 16:51	1
44_2013	35.069	94.214	9/5/13 15:17	2
44_2013	35.074	94.231	9/9/13 16:12	1
44_2013	35.075	94.223	9/9/13 17:02	2
44_2013	35.07	94.192	9/13/13 13:10	3
44_2013	35.072	94.194	9/13/13 15:30	3
44_2013	35.073	94.193	9/13/13 17:58	2
44_2013	35.071	94.226	9/17/13 13:29	1
44_2013	35.072	94.229	9/17/13 16:27	2
44_2013	35.067	94.23	9/17/13 17:13	3
44_2013	35.074	94.239	9/21/13 15:43	3
44_2013	35.081	94.253	9/25/13 13:15	2
44_2013	35.08	94.246	9/25/13 16:40	1
44_2013	35.076	94.239	9/25/13 17:25	3
44_2013	35.068	94.222	9/29/13 13:04	2
44_2013	35.083	94.238	10/3/13 15:15	3
44_2013	35.08	94.234	10/3/13 17:36	2
44_2013	35.081	94.251	10/7/13 13:07	2
44_2013	35.084	94.25	10/7/13 13:14	3
44_2013	35.091	94.25	10/7/13 16:12	3
44_2013	35.074	94.243	10/11/13 13:30	2
44_2013	35.08	94.246	10/11/13 15:29	3
44_2013	35.077	94.244	10/11/13 17:11	2
44_2013	35.09	94.266	10/15/13 13:03	2
44_2013	35.089	94.262	10/15/13 13:11	2
44_2013	35.089	94.273	10/15/13 13:48	3
44_2013	35.098	94.272	10/15/13 16:26	2
44_2013	35.184	94.101	10/19/13 13:17	1
44_2013	35.174	94.107	10/19/13 15:42	2
44_2013	35.185	94.109	10/19/13 18:39	2
44_2013	35.17	94.127	10/23/13 13:13	1
44_2013	35.181	94.138	10/23/13 16:39	1
44_2013	35.086	94.256	10/27/13 13:01	3
44_2013	35.093	94.255	10/27/13 18:10	1
44_2013	35.091	94.247	10/27/13 18:42	3
44_2013	35.113	94.272	10/31/13 13:14	1
44_2013	35.111	94.275	10/31/13 13:16	1
44_2013	35.114	94.272	10/31/13 15:14	3
44_2013	35.109	94.272	10/31/13 16:54	2
44_2013	35.113	94.265	10/31/13 17:24	3
44_2013	35.102	94.201	11/4/13 18:21	2
44_2013	35.104	94.221	11/4/13 18:47	3
44_2013	35.091	94.234	11/8/13 13:19	2
44_2013	35.092	94.23	11/8/13 15:28	3
44_2013	35.097	94.252	11/12/13 16:23	2
44_2013	35.097	94.248	11/12/13 18:32	2
44_2013	35.09	94.239	11/16/13 15:41	3
44_2013	35.091	94.247	11/20/13 14:56	1
44_2013	35.101	94.246	11/24/13 13:24	2
44_2013	35.093	94.251	11/28/13 15:11	3
44_2013	35.095	94.25	11/28/13 17:15	2
44_2013	35.096	94.268	12/2/13 13:55	2
44_2013	35.095	94.269	12/2/13 16:06	1
44_2013	35.094	94.256	12/6/13 13:26	3
44_2013	35.099	94.256	12/6/13 17:04	1
44_2013	35.097	94.267	12/10/13 16:21	1
44_2013	35.101	94.262	12/14/13 15:37	1
44_2013	35.092	94.259	12/18/13 13:25	2
44_2013	35.099	94.258	12/18/13 13:32	3
44_2013	35.096	94.248	12/18/13 16:34	1
44_2013	35.086	94.259	12/22/13 13:40	2
44_2013	35.094	94.24	12/22/13 17:47	2
44_2013	35.103	94.13	12/26/13 13:10	1
44_2013	35.108	94.102	12/26/13 15:08	1
44_2013	35.124	94.096	12/26/13 16:50	2
